# Supplementary material for: Stem Cell Technology Provides Novel Tools to Understand the Impact of Human Variation on Malaria
Source: Research Square preprint supplement (doi:10.21203/rs.3.rs-1808642/v1), 2025-12-15
Supplement: Supplementary file 1 [file 08c735841418f7cd4446bfc7.pdf]

## SCHEMATIC REPRESENTATION OF THE STRATEGY

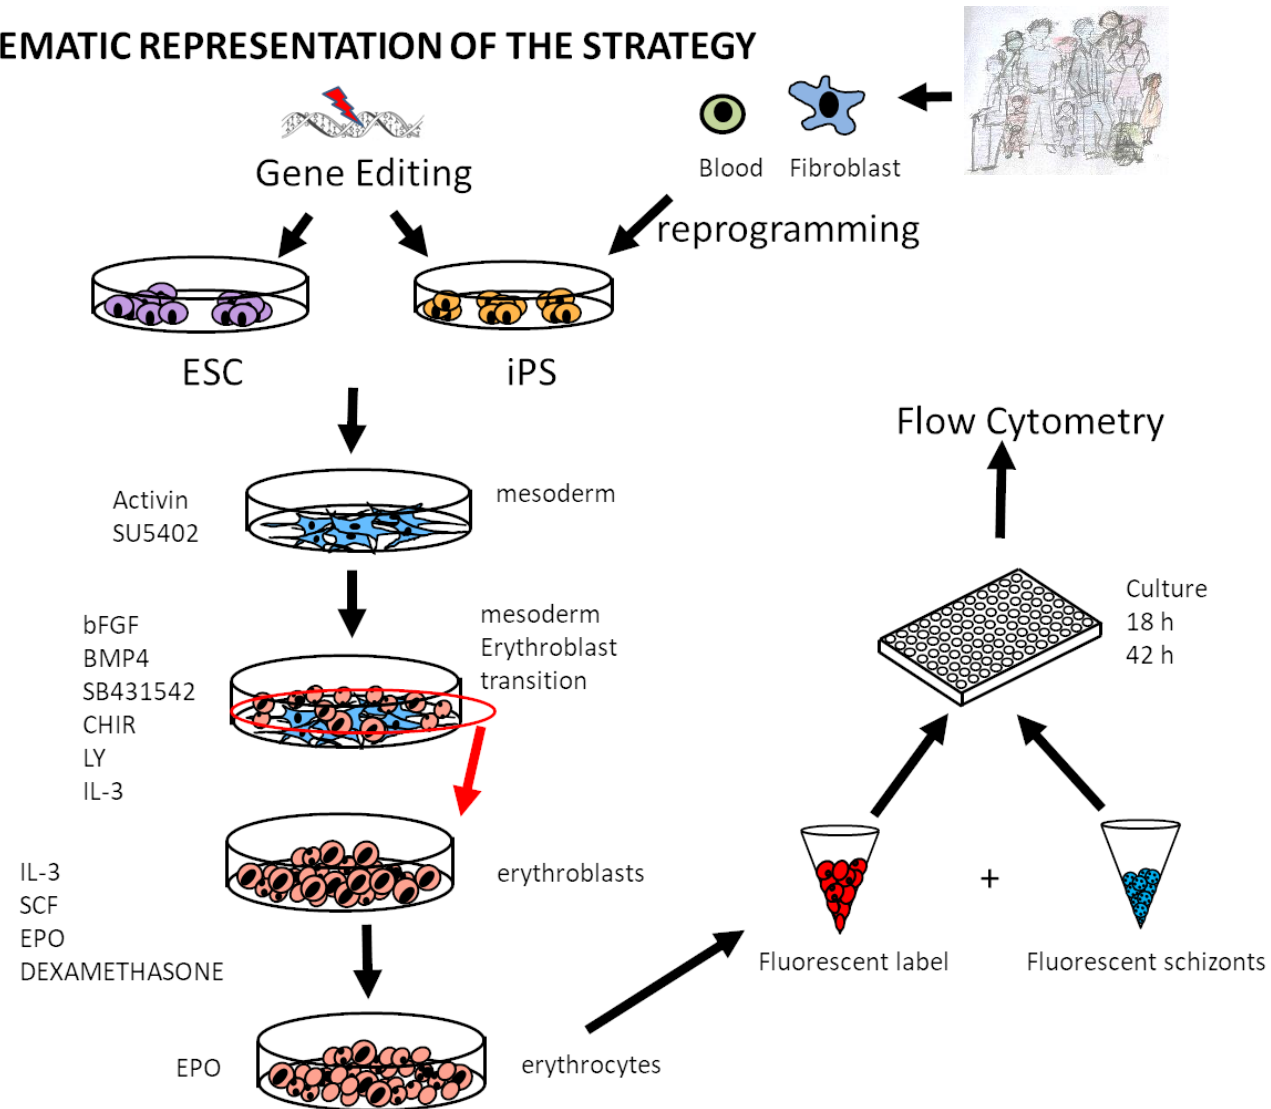

**Supplementary Fig 1:** schematic representation of the strategy to generate erythroid cells *in vitro* pluripotent stem cells of diverse origin to assess invasion by *P. falciparum*

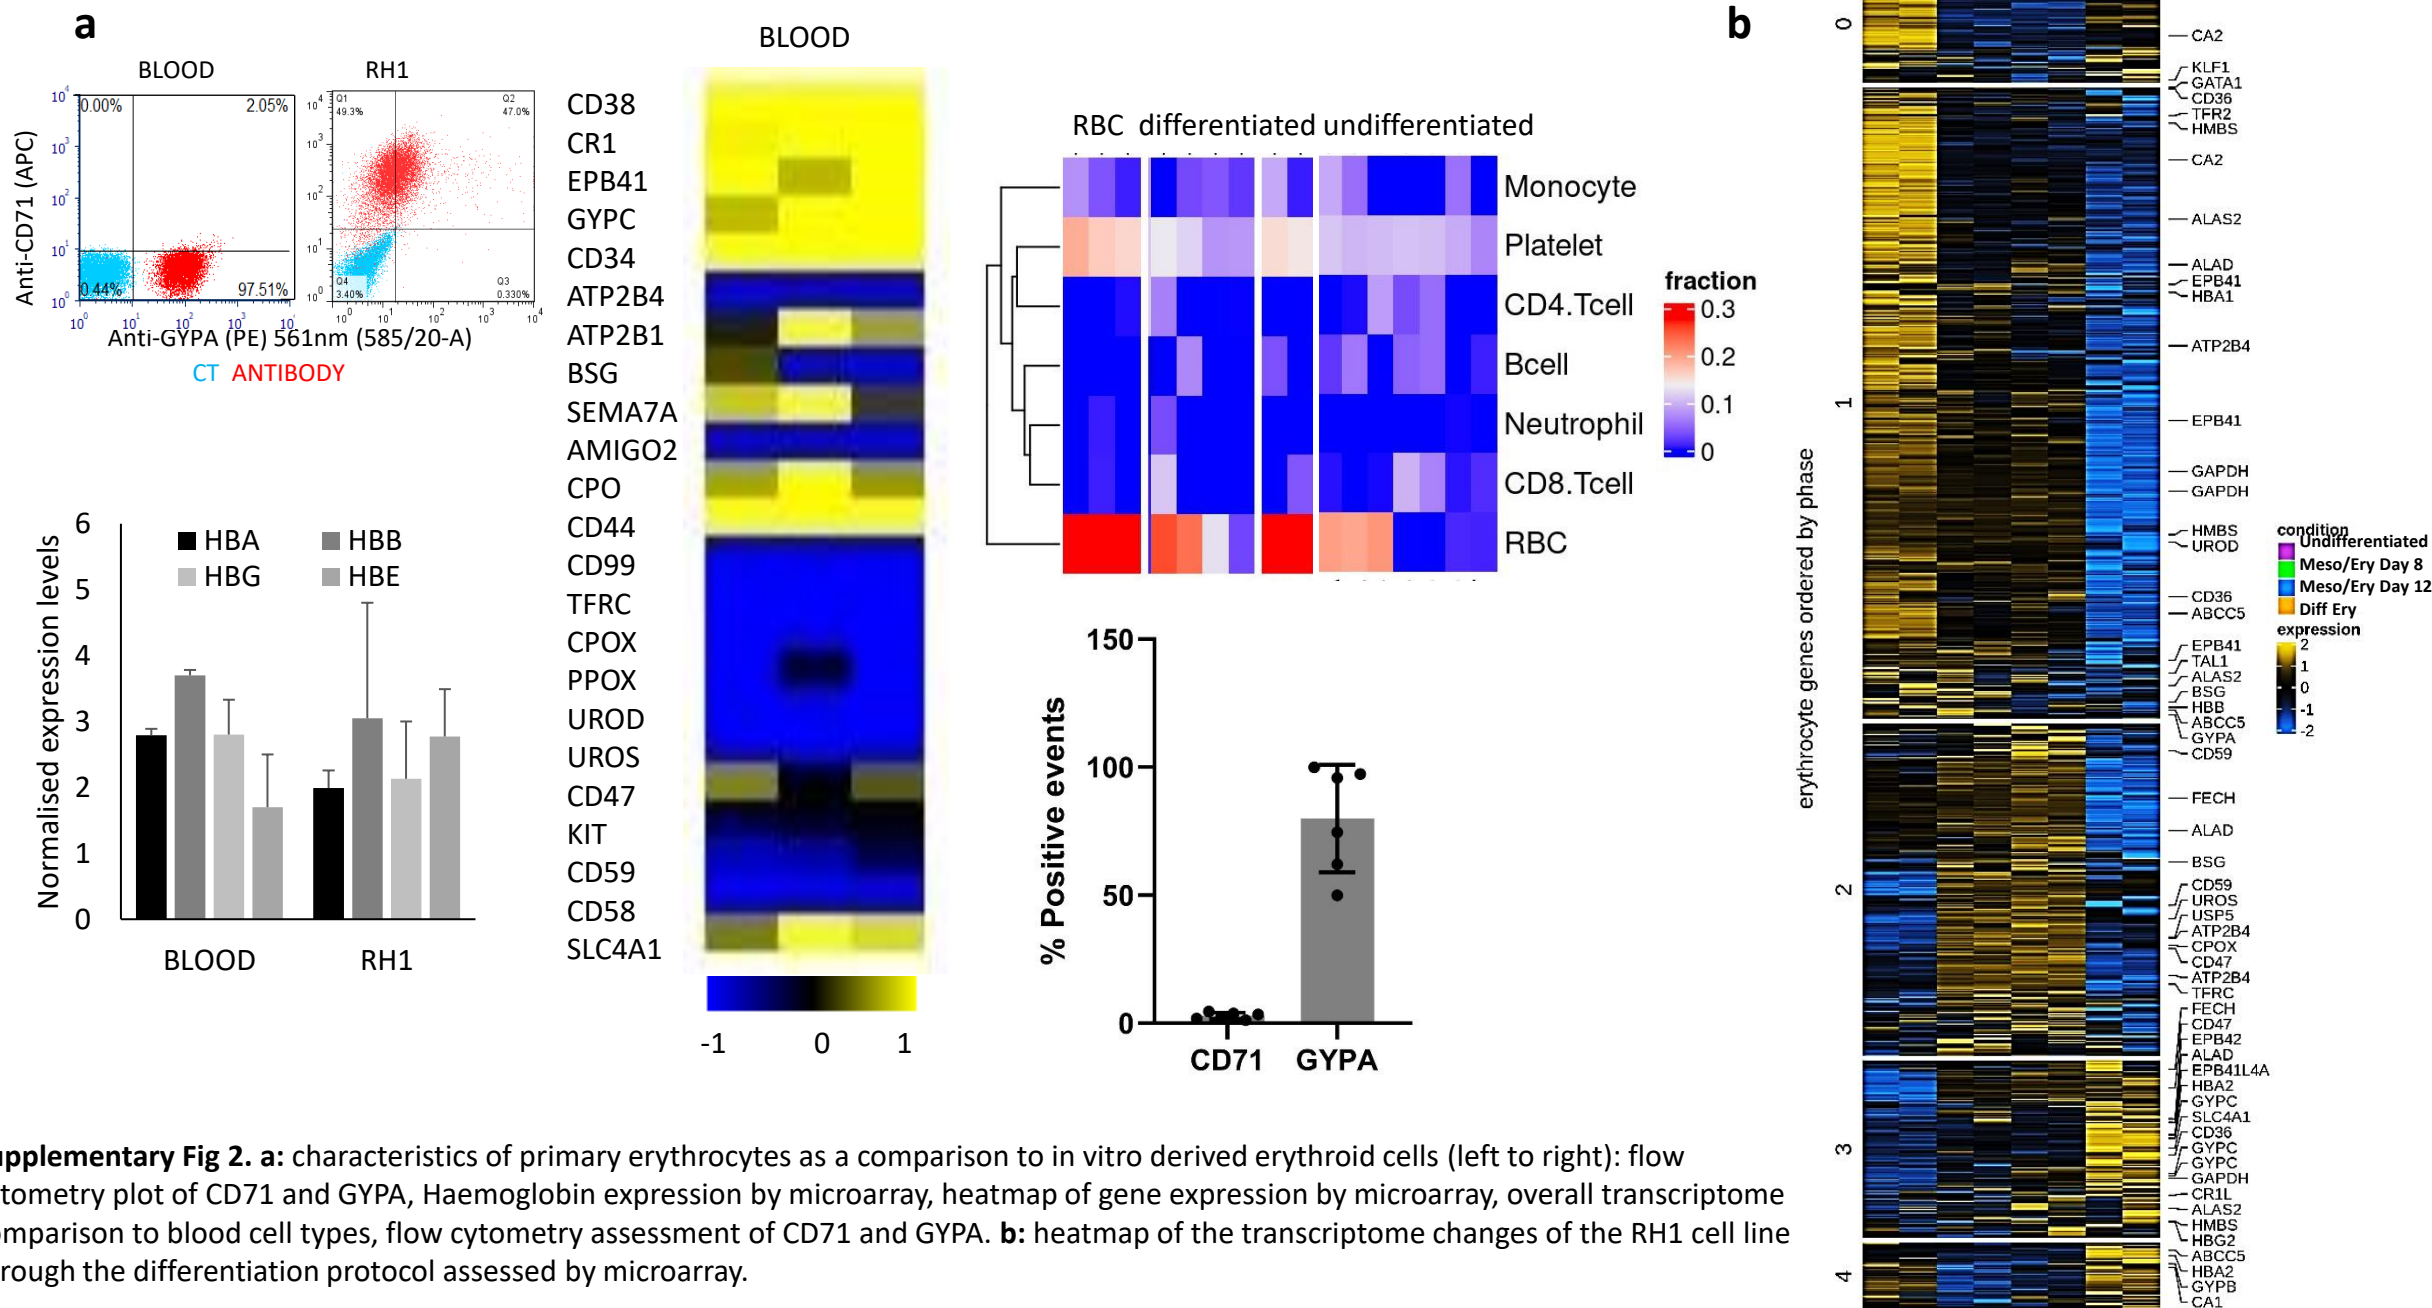

**Supplementary Fig 2. a:** characteristics of primary erythrocytes as a comparison to in vitro derived erythroid cells (left to right): flow cytometry plot of CD71 and GYPA, Haemoglobin expression by microarray, heatmap of gene expression by microarray, overall transcriptome comparison to blood cell types, flow cytometry assessment of CD71 and GYPA. **b:** heatmap of the transcriptome changes of the RH1 cell line through the differentiation protocol assessed by microarray.

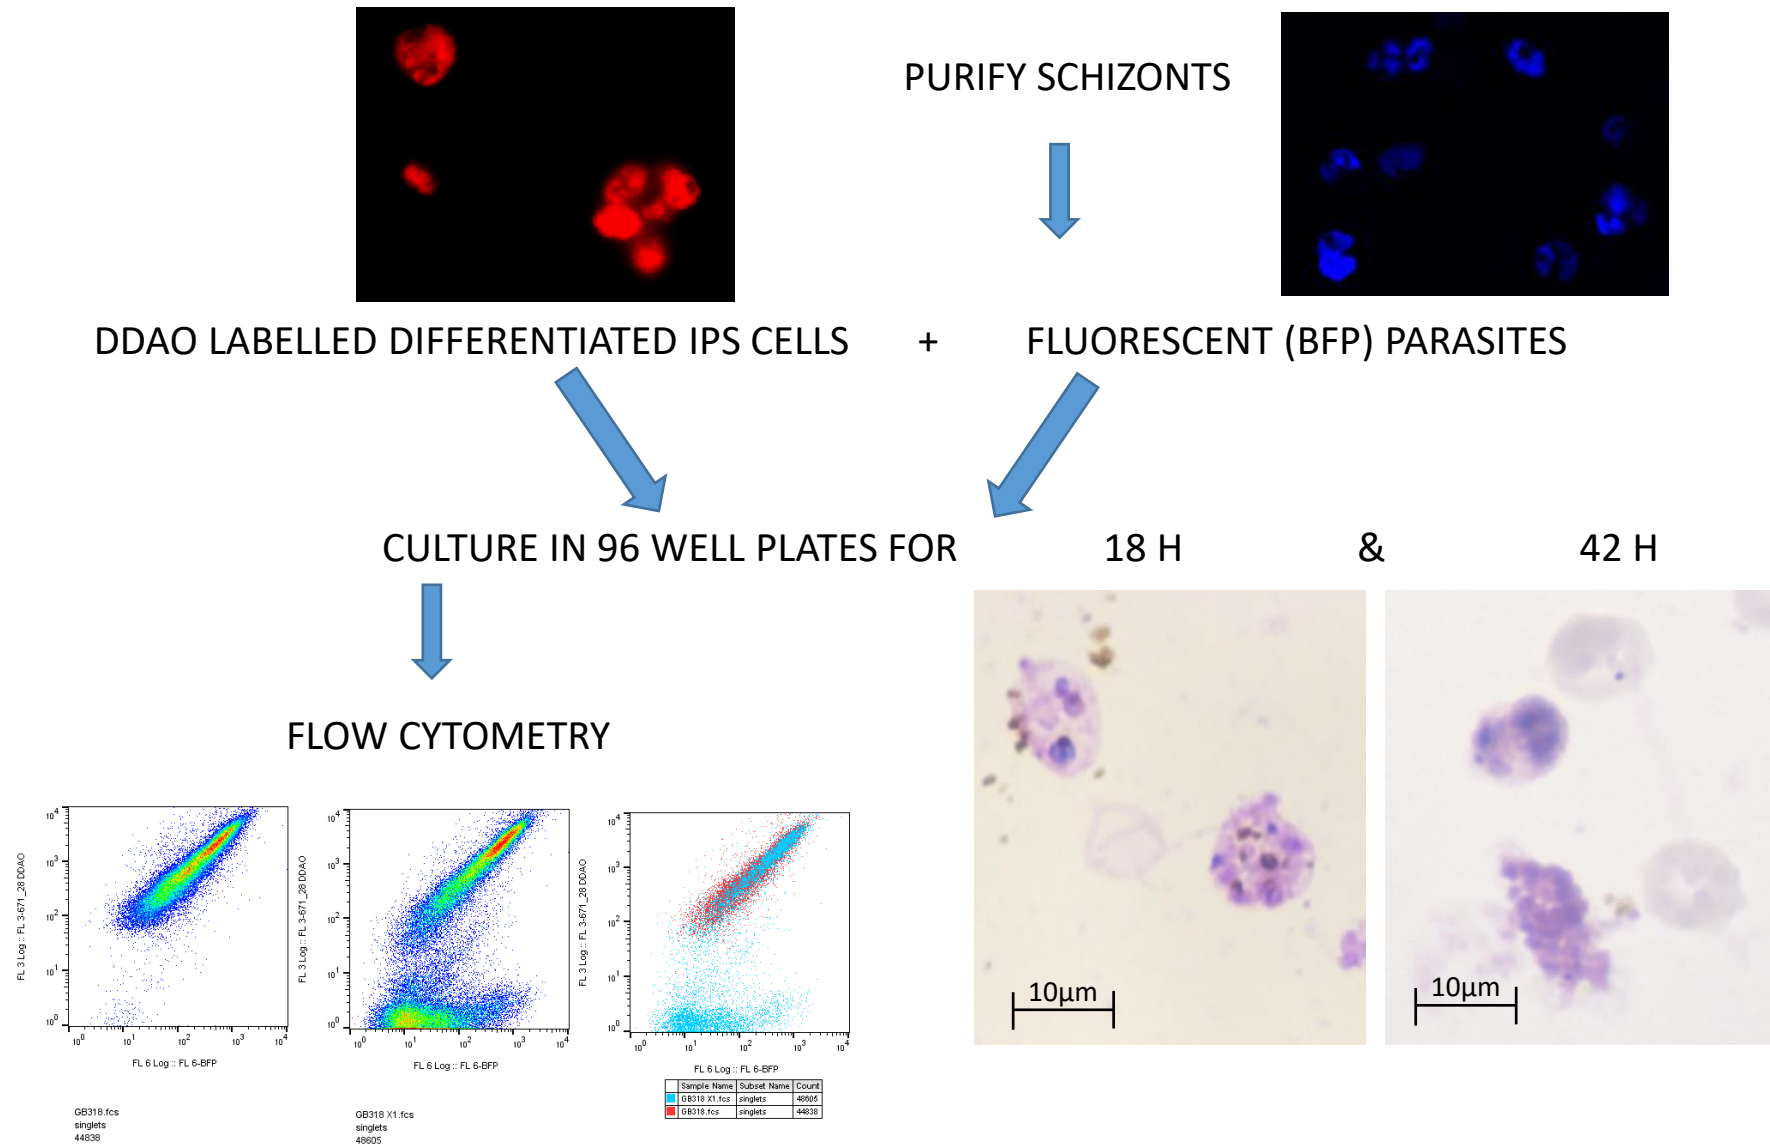

**Supplementary Fig 3:** design of the invasion assay developed to assess infectivity of *P. falciparum* into *in vitro* derived erythroid cells

## MO-FLO FLOW CYTOMETRY OPTICS LAYOUT

Laser Path 1 - Z Config, 488nm excitation (50mW)

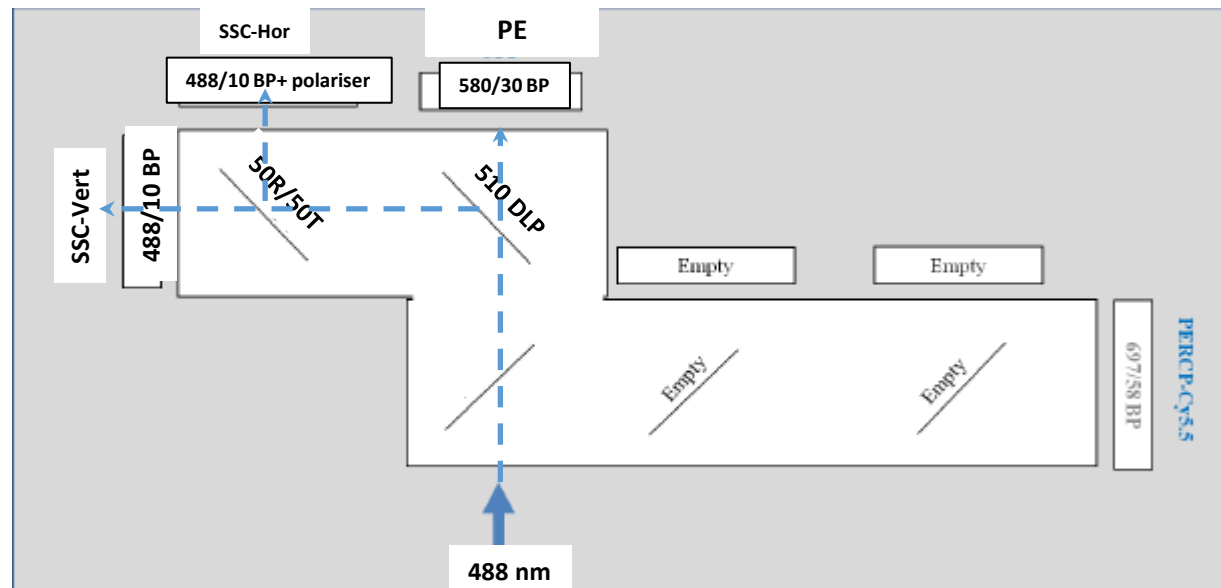

Supplementary Fig 4: set up of the flow cytometer to detect hemozoin by light depolarisation

# GATING STRATEGY - mCHERRY PARASITES

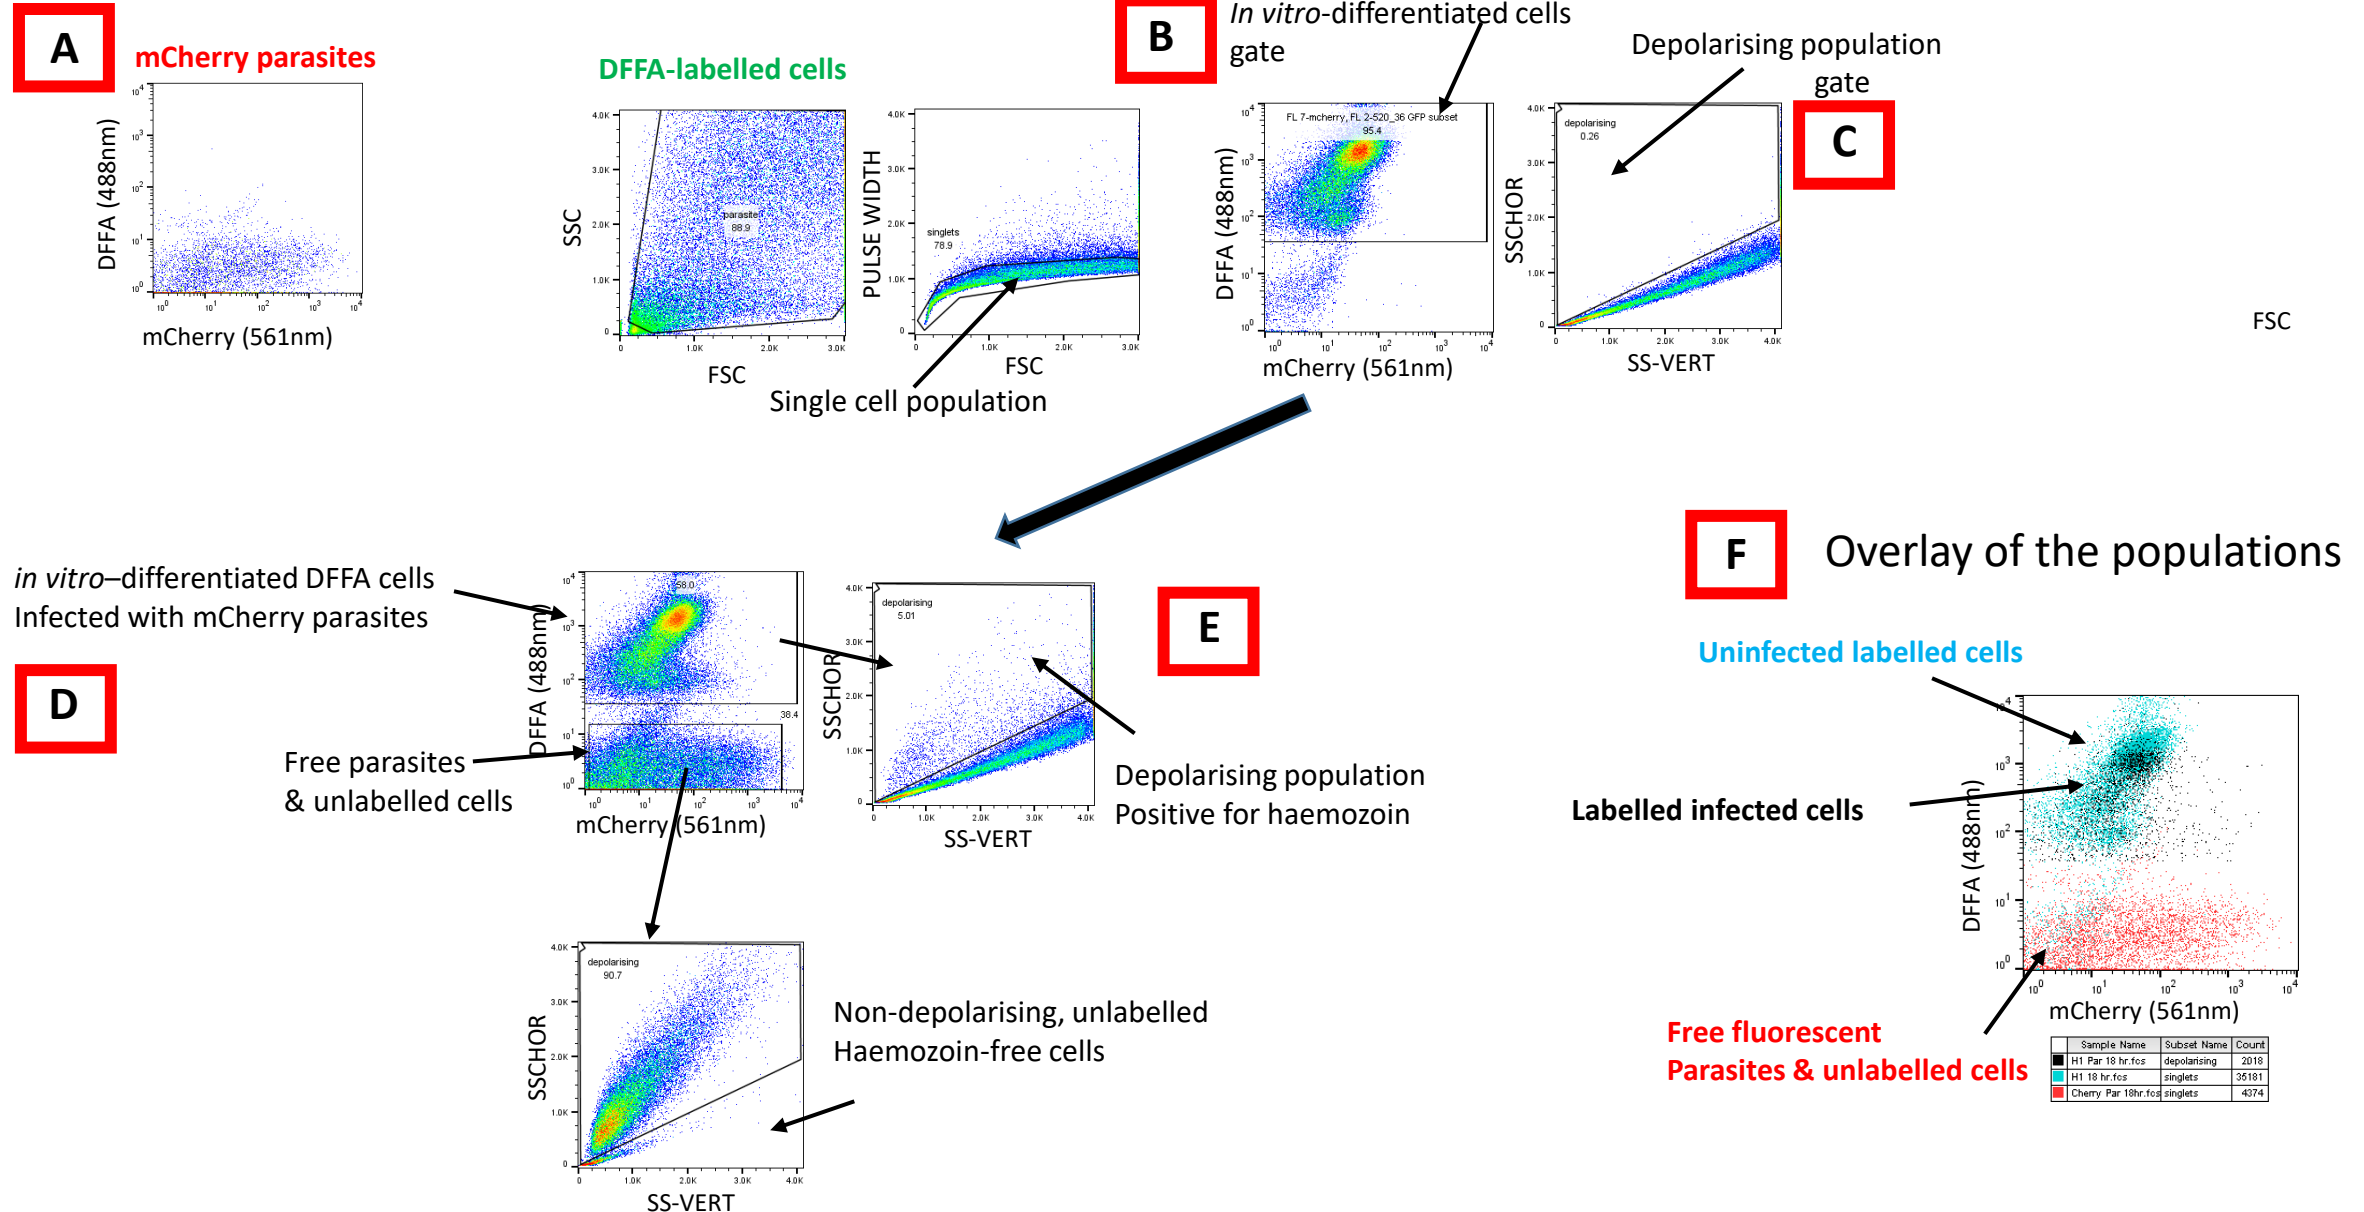

**Supplementary Fig 5:** gating of invasion assays. A: fluorescent parasites alone; B labelled target cells alone and C depolarisation gate; D co-culture of labelled cells and parasites applying the established gates to assess parasitaemia (E). F overlay of the population of labelled non-infected cells, labelled infected cells and parasites alone.

## INVASION GATING - MIDORI-ISHI PARASITES

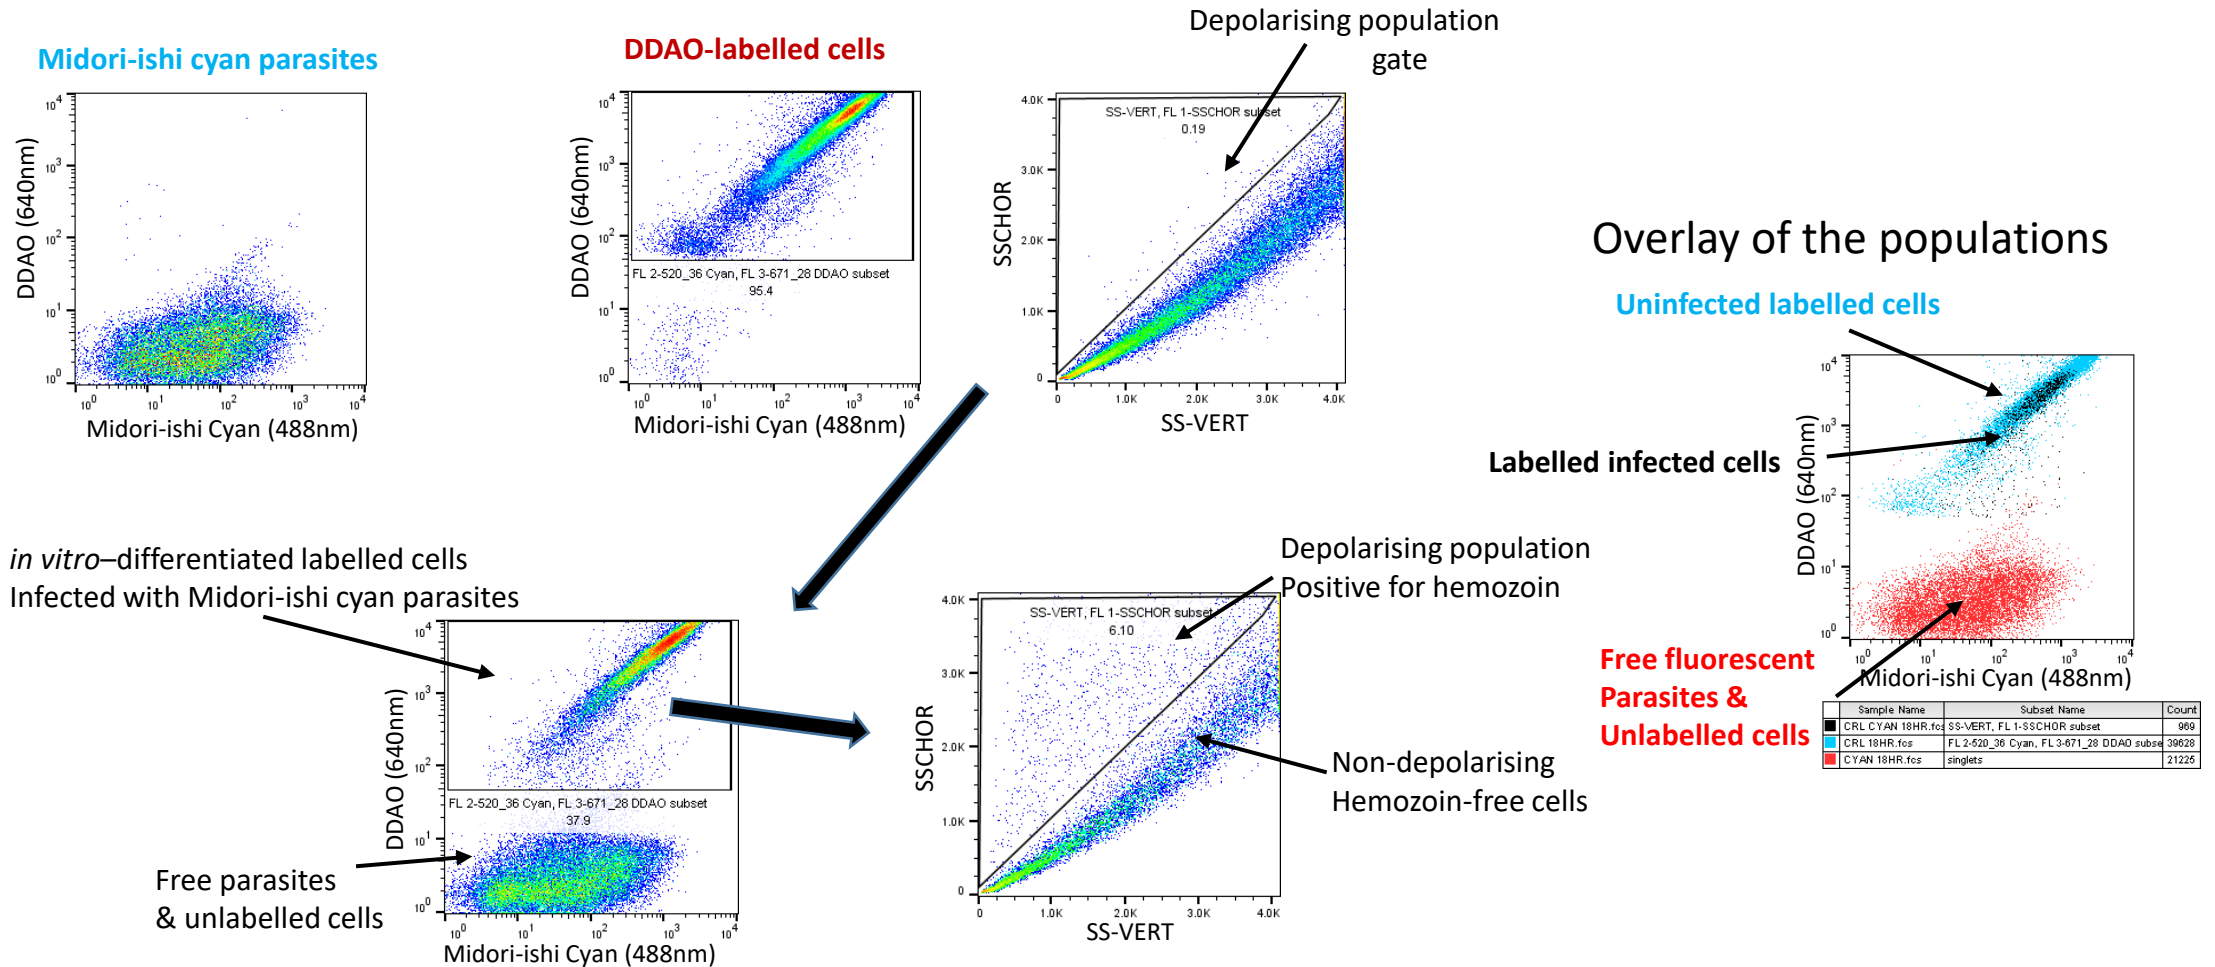

**Supplementary Fig 6:** gating of invasion assays. Same strategy as Figure 5 but using the far-red cell dye DDAO to label the target cells and parasites expressing Midori-ishi cyan fluorochrome



# INVASION GATING - tag-BFP PARASITES

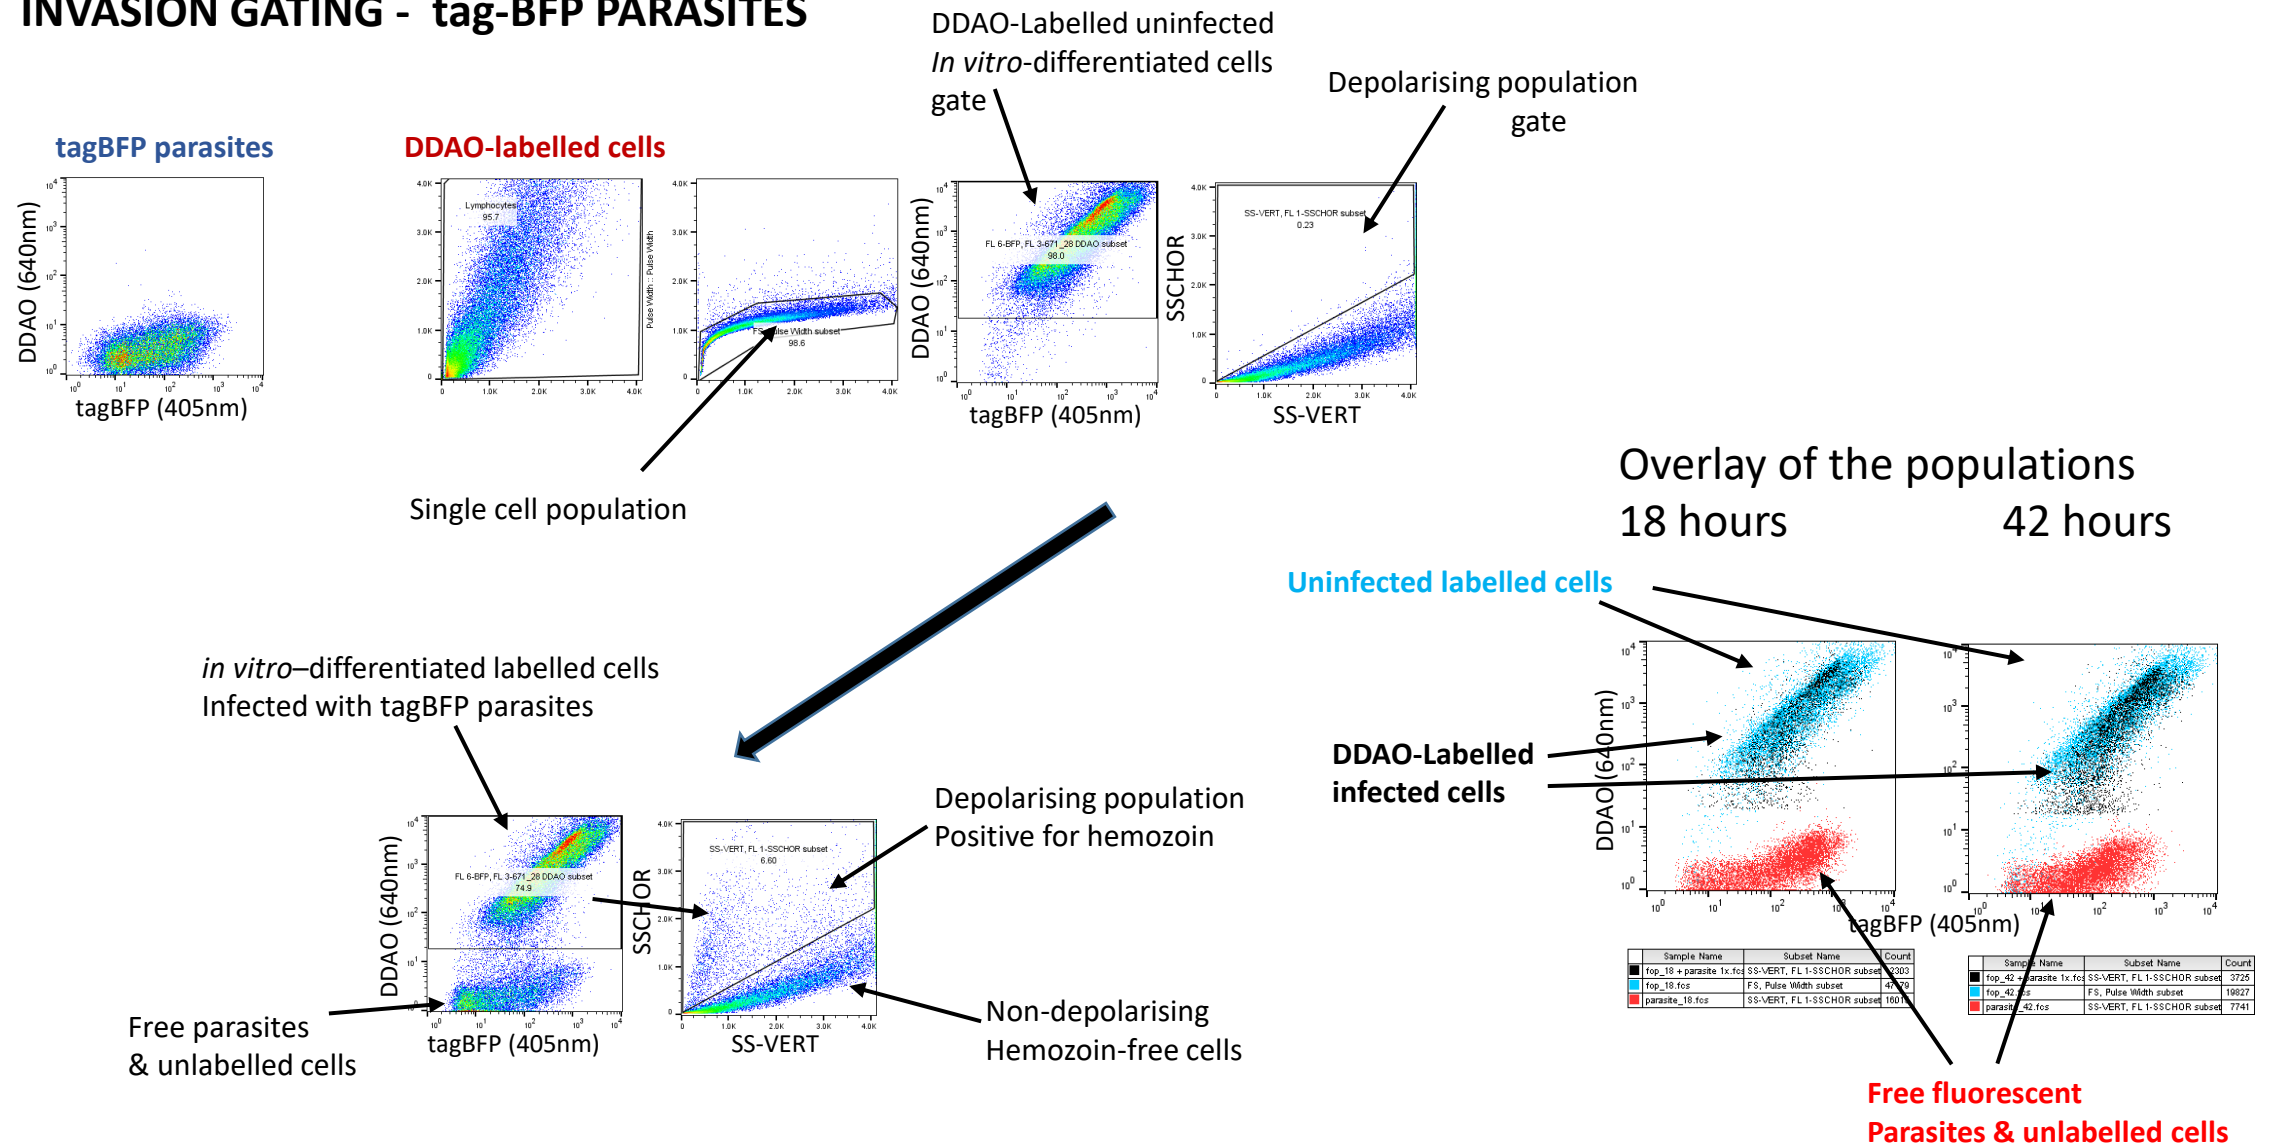

**Supplementary Fig 7:** gating of invasion assays. Same strategy as Figure 5 but using the far-red cell dye DDAO to label the target cells and parasites expressing tag-BFP fluorochrome

## HAEMOZOIN GATE FOR MATURE PARASITES

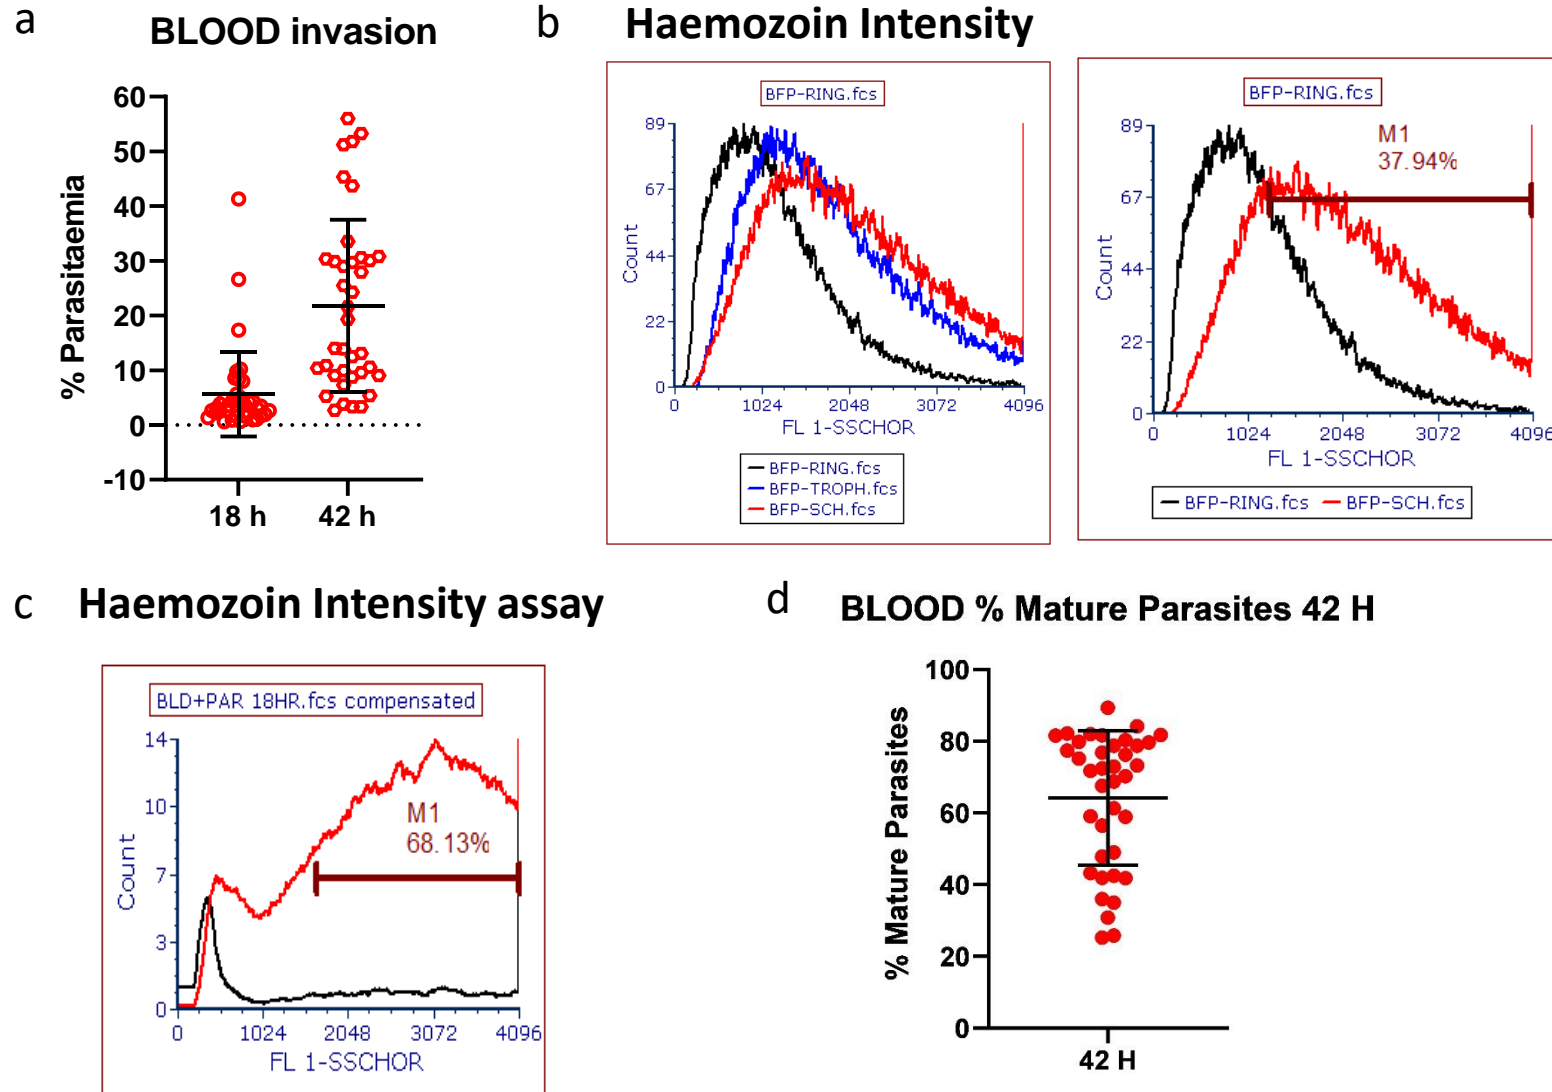

**Supplementary Fig 8:** invasion quantification in primary erythrocytes. a: Hz depolarisation of invasion assays at 18 and 42 hours. b: depolarisation intensity in synchronised cultures of parasites. c: determination of Hz intensity gate for assessment of growth. d: % of mature parasites at 42 hours of culture in primary erythrocytes are measured by Hz intensity. Results are presented as means and SD.



GENOME EDITING STRATEGY

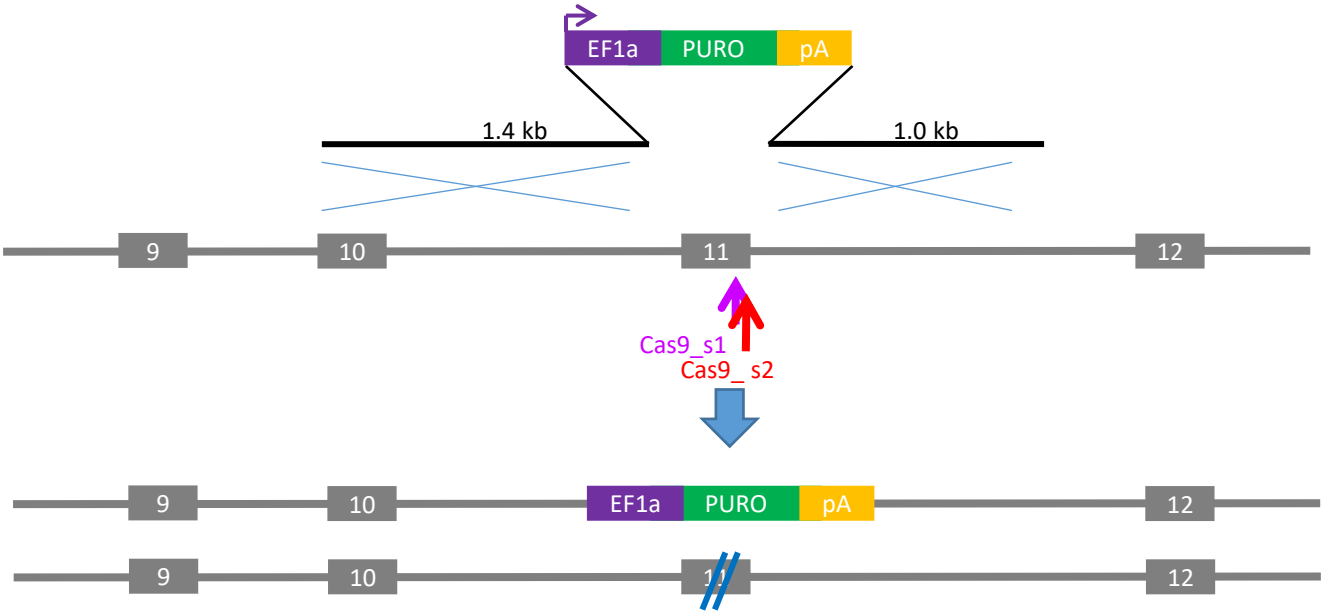

Supplementary Fig 9: diagram of the genome editing strategy used to knock out Basigin and ATP2B4

# GENOTYPING OF EDITED LINES

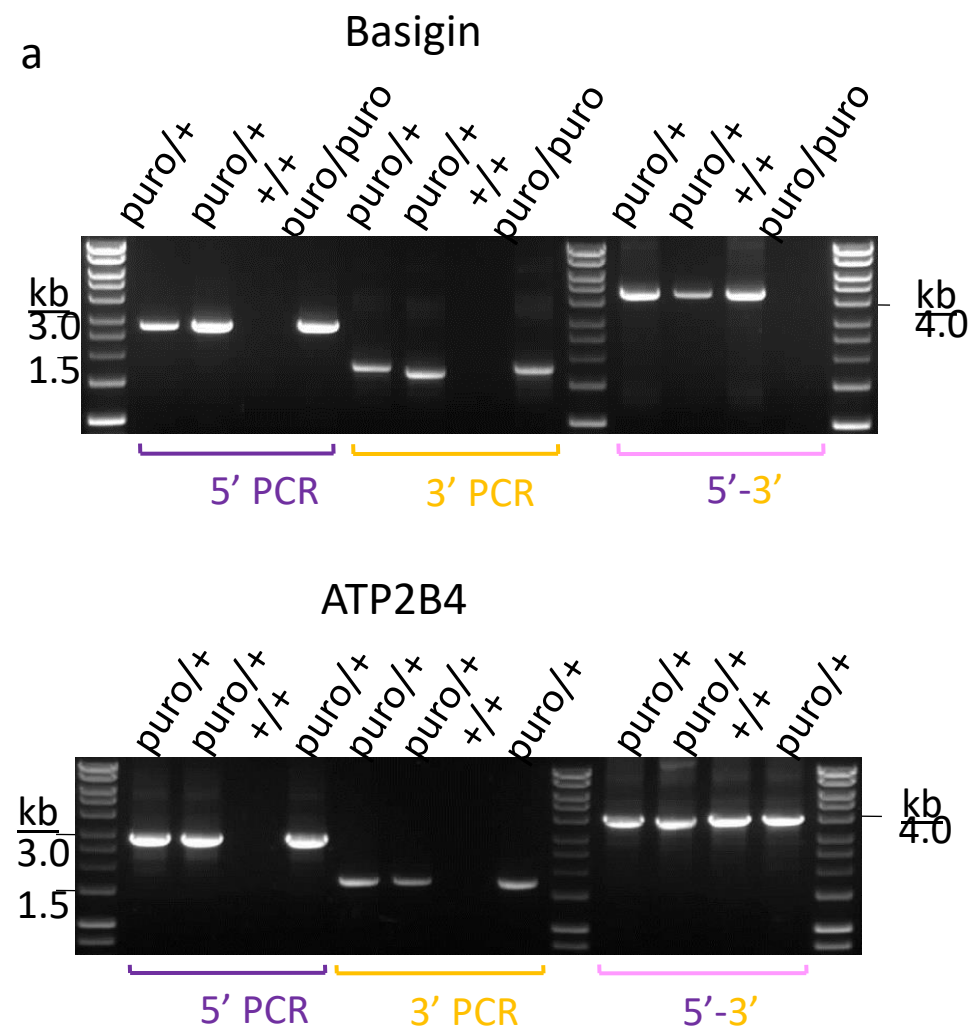

**b**

|        | ...5' Homology Region   |                                 | 3' Homology region...    |
|--------|-------------------------|---------------------------------|--------------------------|
| Exon 5 | TGG TCT GCA AGT CAG AGT | CCG TGC CAC CTG TCA CTG         | ACT GGG CCT GGT A        |
| BSG    | TGG TCT GCA AGT CAG AGT | CCG TG- - - - - T CAC <b>TG</b> | <b>A</b> CTG GGC CTG GTA |
| C5B1   | TGG TCT GCA AGT CAG AGT | CCG - - - - - TGT CAC <b>TG</b> | <b>A</b> CTG GGC CTG GTA |
| B5     | TGG TCT GCA AGT CA- - - | - - - - - C TGT CAC <b>TG</b>   | <b>A</b> CTG GGC CTG GTA |

|           | ...5' Homology Region   |                           | 3' Homology region...          |
|-----------|-------------------------|---------------------------|--------------------------------|
| Exon 11   | ATG AGC ACC GTC ATC AGG | AAT CCC AAC GGT GGC TTC   | CGT ATG ... ATC TGC ATA GCT    |
| ATP2B4 A1 | ATG AGC ACC GTC ATC AGG | AAT CCC AAC GGT GC- T TC  | GTA TG ...A TCT GCA <b>TAG</b> |
| ATP2B4 E6 | ATG AGC ACC GTC ATC AGG | AAT CCC AAC G- T G GCT TC | GTA TG ...A TCT GCA <b>TAG</b> |

**Supplementary Fig 10:** assessment of edited cell lines. a: genotyping across the homology arms to detect the insertion of the selection cassette. b: sequencing the second allele to detect damage leading to inactivation.
