# Supplementary material for: Stem Cell Technology Provides Novel Tools to Understand the Impact of Human Variation on Malaria
Source: Research Square preprint supplement (doi:10.21203/rs.3.rs-1808642/v1), 2025-12-15
Supplement: Supplementary file 1 [file 72d3192284337c199d55a416.xlsx]

## Sheet: Differentiation
MESODERM STAGE																		ERYTHROID STAGE
PLURIPOTENT MARKERS									MESODERM / HAEMATOPOIETIC MARKERS									HAEMOGLOBINS		qRT-PCR			surface markers		flow cytometry
Undifferentiated		qRT-PCR							Undifferentiated		qRT-PCR							RH1					RH1
POU5f1	3166.1	3613.4	3413.2						TAL1	16.74	4.7	5.24	1.8					Hbα	1408.55	729.114	442.643		CD71	43.21	51.6	24.6	34.1	76.1	71.3	63	92.3
NANOG	584.4	608.9	643.5						BRACHYURY	1.84	1.86	4.53	3.23					Hbβ	8023.41	7332.05	6793.79		GYPA	63.7	37.2	25.7	47	64.6	71.7	57.8	72.7
Myc	1039.3	1150.9	1070.5						GATA 1	2.54	2.16	2.9						Hbζ	363	537.455	344.892		SF2
									KLF1	8.3	10.8	11.31	8.08					Hbε	3795.3	3209.3	2256.7		CD71	38.2	29	68.2	59.9
Mesoderm									MIXL1	1.8	1.26	13.6						SF2					GYPA	50.1	39.1	78.8	70.5
POU5f1	139.3	106.5	121.5						MESP1		21.259	11.31	8.08					Hbα	270.597	304.437	378.4		K4
NANOG	422.1	486.8	438.1						SOX17	7.89	7.98	4.5	7.3					Hbβ	3929.15	2977.74	3516.68		CD71	30.5	26.6	66	65.1
Myc	504.3	512.7	574.2															Hbζ	427.565	448.822	458.3		GYPA	42.1	43.3	73.2	83.6
									Mesoderm									Hbε	1200.98	5873.48	1305.2		CD5
Meso/Ery transition									TAL1	71.01	34.17	41.7875						K4					CD71	78.69	76.7	67.7
POU5f1	85.7	97	119.1	117.4	74.2	104.5			BRACHYURY		2.2	4.31691	13.8					Hbα	233.941	184.823	171.3		GYPA	55.8	70.2	65.1
NANOG	80.6	82.2	97	94	77.2	89.9			GATA 1	194.7	50.5626	27.4						Hbβ	3541.14	3125.78	3516.6		CD3
Myc	114.6	122.3	107.5	86.3	83.8	74.5			KLF1	2778.33	1924.14	512	1082.39					Hbζ	221.322	151.167	280.9		CD71	86.1	57.7	85.4	57.7
									MIXL1	1.2	1.1	0.9	1.4					Hbε	1278.29	1820.35	3795.3		GYPA	28.1	52.6	23.5	23.5
									MESP1	749.6	499.728	436.5						CD5					GB4
									SOX17	33.5909	38.8542	13.45						Hbα	572.051	855.13	724		CD71	51.53	57.7	61.6
																		Hbβ	3875.05	3492.39	2904		GYPA	38.6	23.3	56.1
									Meso/Ery transition									Hbζ	147.033	124.5	119		GB1
									TAL1	1105.13	530.056	242.191	670.921					Hbε	467.882	474.413	324.03		CD71	30.9	32.8	71.6	76.9
									BRACHYURY	3.5	4.3	3.7	4.5					CD3					GYPA	40.7	53.3	73.3	83.6
									GATA 1	2272.4	1530.73	537.455	1002.93	208.7	109.1			Hbα	374.806	337.794	341		SHEF6
									KLF1	5.33319	13.8	17.9	13.8					Hbβ	1428.22	1910.85	1100.4		CD71	13.17	49.3	57.2
									MIXL1	10.2	39.1	16.8	18.9	1.1				Hbζ	196.72	207.937	144		GYPA	33.2	54.1	57
									MESP1	823.143	352.1	726.6	258.7	533.7	398.9			Hbε	2740.08	2628.46	1850.7		SHEF3
									SOX17	2.85	1.03	0.19	0.15					GB4					CD71	77.75	47.4	44.7
																		Hbα	855.13	572.051	873.098		GYPA	55.7	62.7	68.9
																		Hbβ	2019.8	2256.7	2904
																		Hbζ	177.294	168.897	65		BLOOD
																		Hbε	1305.15	2019.8	1278.29		CD71	2.45	1.13	3.86	1.78	3.49	4.55
																		GB1					GYPA	95.8	74.6	49.98	62.1	97.32	99.9
																		Hbα	519.147	1217.75	1354.79
																		Hbβ	32093.6	18101.9	16427.8
																		Hbζ	326.288	324.034	270.6
																		Hbε	1696.78	6054.8	6122.9
																		SHEF6
																		Hbα	1144.1	3565.78	2067.76
																		Hbβ	9026.81	16728.3	6793.79
																		Hbζ	227.544	265.028	344.89
																		Hbε	861.078	891.444	739.3
																		SHEF3
																		Hbα	634.73	458.253	670
																		Hbβ	6122.9	2091.03	2194.99
																		Hbζ	537.455	404.501	822.5
																		Hbε	670.921	724.077	634.73

## Sheet: heatmap data
MESODERM DIFFERENTIATION RH1							ERYTHROPOIETIC DIFFERENTIATION RH1							ERYTHROPOIETIC DIFFERENTIATION WILD TYPE LINES
TargetID	MDII	MDIII 4	MDIII 8	MDIII 12				Meso/Ery 8	Meso/Ery 12	Ery I	Diff Ery			TargetID	RH1	SF2	K4	CD5	GB1	SHEF3
BMPR1A	2.62317	0.19498	0.29027	0.698827			CD38	1.06972	-0.140371	-0.444067	0.129556			AMIGO2	-0.650748	-0.353311	0.357625	-0.989904	-0.17679	-0.267361
ACVR2B	1.55375	-0.708676	0.0875801	0.357657			CR1	1.4	0.33	0.193	0.466			ATP2B1	0.757024	1.37035	0.514732	0.39155	0.262	0.297
NODAL	0.248735	0.250548	0.168098	-0.299614			EPB41	0.692089	1.11	0.995472	0.718			ATP2B4	0.362063	0.912844	0.843534	0.192439	1.13581	0.955445
KLF4	0.24101	-0.0295232	-1.11579	-1.03802			GYPC	0.365613	0.694265	0.663805	0.778191			BCAM	-0.0326788	0.485299	-0.813543	-0.402547	-0.41914	-1.39152
BMP7	0.792166	0.102498	0.284404	0.958409			CD34	0.458	-0.74	0.42	0.676			BSG	0.381252	-0.0226449	0.285067	0.0921844	0.594415	-0.202627
BMP2	0.788807	1.09363	0.0262484	0.262119			ATP2B4	0.33	0.491	0.616	0.3748			CD34	1.19866	-0.491417	0.991852	0.210556	0.486278	0.485616
BMP4	0.804838	1.17886	0.356223	0.298708			ATP2B1	0.2039	0.1729	0.3378	0.0422			CD36	-0.462914	0.0629231	0.681958	-0.774995	-0.132825	0.488978
CD34	1.5029	1.84175	0.60053	0.0473091			BSG	0.3477	0.308604	0.217993	0.381252			CD38	0.129556	0.82585	0.361949	0.237657	-0.128293	-0.538058
CFC1	0.996644	0.986218	1.07529	0.289425			SEMA7A	0.17655	-0.217968	0.0560392	-0.0301578			CD44	0.529	-0.344207	-0.353356	-0.845204	0.789325	0.380802
TBX6	0.338601	1.32971	0.984266	1.55495			AMIGO2	-0.402296	0.519682	-0.650748	-0.208719			CD47	0.365911	0.672331	0.548545	0.387841	0.415793	0.411621
CBFA2T2	0.546235	0.744791	0.305515	-0.576704			CPO	0.192122	0.0379915	1.17845	-0.861705			CD55	-0.0792038	0.196932	-0.908656	-0.481843	-0.594371	-0.868081
RUNX1	-1.31867	0.492007	-0.609529	-0.259681			CD44	-0.505382	0.369	-0.491033	-0.668741			CD58	0.259917	0.342243	-0.0916738	0.110014	0.0730971	0.308226
EOMES	0.781421	1.5068	1.07532	0.652842			CD99	-0.708821	0.781172	1.00881	1.08119			CD59	0.10032	0.515819	0.266058	0.245113	0.141545	0.292714
BMPR1B	0.245449	0.773991	0.716447	-0.346999			TFRC	-1.06139	0.151682	-0.0446622	-0.263193			CD99	1.08119	0.404484	0.906082	0.474333	1.44192	0.180367
CDH5	-0.0622788	-0.191674	0.101931	-0.698872			CPOX	-0.429509	0.492817	0.506502	0.00943289			CR1	0.253342	0.68	0.374295	0.5	1.05702	0.33
CBFA2T3	0.0560456	0.144654	0.757767	-0.646029			PPOX	-0.392154	0.555561	0.156114	-0.172779			DARC	-0.152191	0.996487	1.62079	0.106529	0.836074	1.06759
GATA1	-0.0282381	0.177366	0.754232	-0.536359			UROD	-0.449354	0.205937	0.09278	0.153131			EPB41	1.311	1.78042	2.15226	1.60844	1.39136	0.547001
TAL1	-0.610378	-0.286834	0.457019	-0.597659			UROS	-0.844897	0.447792	0.275955	0.518078			EPOR	-0.115628	0.715386	1.0004	0.422515	0.107804	0.415208
T	-0.628813	-0.459808	1.255	1.75199			CD47	-0.754368	0.200436	0.365911	0.0242094			ERMAP	0.51	0.743294	0.159208	0.111578	0.109242	0.160201
MIXL1	-0.399091	-0.00733399	1.07944	1.84515			KIT	-0.328299	0.0949938	0.988196	0.0731082			F11R	0.248197	0.736881	0.308199	-0.347586	-0.282236	-1.11254
SNAI2	-0.957899	-0.297202	0.43764	0.520246			CD59	-1.16829	-0.203377	0.475	-0.908481			GYPA	-0.477446	-0.415514	0.0219739	-0.303365	-0.134869	-0.150143
KIT	-0.399297	-0.72196	0.167635	0.0949938			CD58	-1.05705	-0.425994	0.259917	-0.999873			GYPB	-0.173844	-0.684826	-0.358562	-0.53262	-0.468975	-0.612723
MESDC2	-0.407666	-1.03038	0.184992	0.189168			SLC4A1	0.00276099	-0.330622	-1.09843	0.361581			GYPC	0.778191	0.677127	0.779241	0.677065	0.82808	0.649774
FLI1	-0.333218	-0.547569	0.14754	-0.530215										ICAM4	0.71	0.134539	0.715209	0.129532	0.736916	0.647647
ACVR1	-0.310376	-0.164455	0.243597	0.391935										NPTN	0.515357	0.332659	0.271028	0.12088	0.271835	-0.00150875
BMP6	-0.976057	-0.888805	0.265878	1.29573										SEMA7A	0.0560392	0.141127	-0.117149	-0.435371	0.17554	-0.302448
SNAI1	-0.360122	-0.512036	-0.159372	1.01228										SLC4A1	0.361581	-0.763924	0.678131	-0.589165	0.554145	-0.466878
CFC1B	-0.413211	-0.40645	0.114535	0.979727										TFRC	-0.0446622	-0.195077	-0.0703291	-0.311858	-0.112752	-0.501109
ACVR2A	-1.12186	-0.744446	-0.303871	0.423985

## Sheet: Haemozoin assay
SENSITIVITY		flow cytometry		Giemsa			TIME COURSE		flow cytometry									HAEMATOCRIT		flow cytometry
TOTAL PARASITAEMIA			0.073
							TIME	2H		6H		20H		46H				HAEMATOCRIT	0.025		0.0013
DILUTION	SAMPLE	%Hz	%SG	CALCULATED				%Hz	%SG	%Hz	%SG	%Hz	%SG	%Hz	%SG				%Hz	%SG	%Hz	%SG
1X	A	8.38	8.26	7.3				0.37	0.75	2.01	4.75	3.74	4.8	6.23	9.56			20H	3.19	3.82	22.15	17.54
	B	8.28	8.25					0.28	0.77	2.31	4.23	4.11	4.92	6.27	8.79				1.4	1.29	14.79	10.72
	C	7.91	7.91					0.25	0.26	2.31	4.07	1.94	2.26	8.17	10.7				1.65	1.76	18.46	15.4
0.5X	A	5.04	4.68	3.65				0.31	0.32	2.12	4.59	3.19	3.82	6.06	8.15				2.27	2.15	2.06	4.63
	B	4.8	4.89					0.69	1.03			4.65	5.55	7.45	10.51				3.01	1.96	4.1	4.56
	C	6.37	6.17					1.04	2.18			4.59	5.25	5.69	7.45				2.32	3.18	3.92	6.28
0.25X	A	1.55	1.45	1.825				0.32	0.64			4.04	2.33						3.87	4.26	4.73	5.67
	B	1.63	1.75					0.46	0.56			3.56	3.74
	C	1.86	1.76															46H	3.45	5.4	10.5	20.75
0.1X	A	0.83	0.79	0.7															4.07	5.62	16.39	25.16
	B	0.97	0.98																6.23	9.56	48.9	63.4
	C	0.95	0.99																6.27	8.79	34.34	42.81
0.05X	A	0.25	0.25	0.365															5.64	16.24	48.4	59
	B	0.29	0.33																12	19.5	39.77	40.45
	C	0.25	0.24
0.001X	A	0.28	0.4	0.071
	B	0.2	0.23
	C	0.13	0.3

## Sheet: Invasion
INVASION IN WILD TYPE CELL LINES					flow cytometry
18 H										42 H
RH1	SF2	K4	CD3	CD5	GB1	GB4	SHEF3	SHEF6		RH1	SF2	K4	CD3	CD5	GB1	GB4	SHEF3	SHEF6
4.48	6.62	5.29	7.84	5.2	7.01	4.78	4.16	6.13		5.8	10.95	6.19	5.17	6.06	10.35	5.35	7.24	8.54
3.83	5.82	7.55	3.12	2.93	9.15	8.94	6.23	3.86		6.78	9.79	11.18	4.61	7.32	13.07	9.99	6.4	9.57
7.01	4.93	12.63	3.06	7.635	6.58	7.44	7.56	8.785		5.09	7.63	15.6	5.45	10.14	9.57	7.39	11.96	11.715
3.35	10.81	10.3	6.83		10.44	10.26		5.62		8.37	8.58	11.52	8.97		11.74	9.56		8.04
5		4.75	2.8		4.8	3.81		9.75		5.25		6.44	6.1		5.04	8.15		12.97
9.65		9.77	4.82			5.1				6.89		11.09	9.14			9.04
8.62		7.21	5.58							14.4		7.36	7.45
5.9		11.36								11.86		12.72
10.59		6.91								5.62		8.08
5.3		11.74								6.41		14.7
3.27		6.81								7.23		8.86
9.78										5.64
6.45										8.56
5.7										4.97
4.39										6.6
5.91										6.96
% MATURE PARASITES
42h
RH1	SF2	K4	CD3	CD5	GB1	GB4	SHEF3	SHEF6
37	51.32	66.04	53.87	64.08	82.08	79.32	72.36	78.26
29.61	75.57	68.28	46.91	64.15	81.03	74.06	59.82	51.79
24.73	96.26	58.13	71.17	78.54	82.05	60.55	56.48	76.37
71.2	84.95	65.41	71.31		84.51	63.87		72.44
58.1		59.55	70.01		81.78	60.42		86.55
60.58		59.94	89.96			51.92
91.34		59.49	86.79
88.82		63.22
90.7		61.31
50.49		64.99
92.04		56.94
93.2
78.51
75.59
22.46
60.21
50

## Sheet: ATP2B4 KO
INVASION	flow cytometry							%T/S	flow cytomety				ATP2B4 expression		microarray
CT 18h	CT 42h	E6 18h	E6 42h	F5 18h	F5 42h			CT	E6	F5			CT		ATP2B4 KO
4.48	6.78	2.32	4.01	6.2	6.98			72.44	85.38	84.09			Undifferentiated	Differentiated	Undifferentiated	Differentiated
5.62	8.04	8.4	9.16	6.235	8.2			64.08	50.18	69.56			1.866	2.08	0.457	0.14
6.62	10.95	5.19	6.8	3.3	5.57			58.1	86.66	80.74			1.85	1.71	0.443	0.101
5	6.89	9.39	11.12	10.21	12.42			75.57	79.47	83.72			1.785	1.075	0.436	0.038
5.82	9.79	6.08	10.49	7.78	7.69			88.82	84.59	77.95			2.396	1.404	0.308	0.214
9.65	14.4	2.81	3.75	4.06	5.29			81.78	84.71				2.018	1.173	0.173	0.223
8.62	11.86	4.92	7.31					86.55	48.58				2.14	1.351	0.307	0.081
9.75	12.97	10	9.43					78.51	61.39				1.965	2.054		0.314
4.93	7.63	6.72	6.73					77.67					2.18	1.973		0.5
9.78	8.56	2.76	4.79					75.59						2.165		0.53
10.81	8.58	4.62	5.01					84.95								0.336
6.45	4.97	3.03	4.92					60.21								0.247
5.7	4.46	3.48	4.87
4.39	6.6
5.91	6.96

## Sheet: BSG KO
INVASION	flow cytometry							%T/S	flow cytometry				BSG expression	microarray
CT 18h	CT 42h	B5 18h	B5 42h	C5 18h	C5 42h			CT	B5	C5			CT		BSG KO
4.48	5.8	2.09	1.98	1.83	4.22			72.44	78.02	84.05			Undifferentiated	Differentiated	Undifferentiated	Differentiated
3.83	6.78	3.25	6.97	0.95	1.67			64.08	73.45	55.4			1.102	1.379	0.038	0.037
2.95	5.09	1.54	2.45	4.1	5.2			64.15	69.38	86.88			1.098	1.244	0.018	0.019
5.62	8.04	1.05	1.62	1.89	2.98			78.54	75.72	61.36			1.153	1.374	0.038	0.076
5.2	6.06	2.01	2.97	3.53	3.56			76.37	71.05	69.91			1.113	1.204		0.056
2.93	7.32	0.25	0.22	2.28	4.42			58.1	82.91	53.91			1.14	1.232
7.6	10.14	2.14	2.38					56.92	77.66	78.79				1.327
8.78	11.71	2.08	3.53					60.58						1.371
6.62	10.95	4.44	5.7					75.57						1.644
5	6.89							88.82						1.581
9.65	14.4							81.78						1.419
8.62	11.86							79.61						1.326
4.8	5.04							86.55						1.18
9.75	12.97							78.51
5.9	5.62							77.67
11.64	8.3							75.59
5.3	7.23							84.95
4.93	7.63							60.68
9.78	8.56							60.21
6.45	4.97
10.81	8.58
4.39	6.6
5.91	6.96

## Sheet: Haemoglobinopathies
INVASION			flow cytometry					GROWTH	% MATURE PARASITES
CT 18h	CT 42h	EM 18h	EM 42h	FJ 18h	FJ 41h			CT	EM	FJ
3.49	6.1	4.92	5.91	1.81	3.57			71.2	62.28	59.21
7.01	8.37	2.91	5.02	2.72	4.05			82.08	78.14	64.19
4.51	7.5	4.54	5.19	2.61	4.58			81.03	76.43	78.81
6.58	9.57	5.13	6.33	3.53	3.71			83.67	78.45	85.98
10.44	11.74	5.58	7.57	5.32	9.25			82.05	75.44	82.09
9.65	14.4			2.16	4.44			84.51
8.62	11.86							81.78
4.8	5.04
